# Supplementary material for: Compressive Strength of Steel Fiber-Reinforced Concrete Employing Supervised Machine Learning Techniques
Source: MDPI journal article supplement (doi:10.3390/ma15124209), 2022-06-14
Supplement: s1 [file s1]

## Supplementary Materials

# Compressive Strength of Steel Fiber–Reinforced Concrete Employing Supervised Machine Learning Techniques

Yongjian Li <sup>1</sup>, Qizhi Zhang <sup>2,\*</sup>, Paweł Kamiński <sup>3,\*</sup>, Ahmed Farouk Deifalla <sup>4</sup>, Muhammad Sufian <sup>5,\*</sup>, Artur Dyczko <sup>6</sup>, Nabil Ben Kahla <sup>7,8</sup> and Miniar Atig <sup>8,9</sup>

<sup>1</sup> James Watt Engineering School, University of Glasgow, Scotland, UK; yongjian4896@outlook.com

<sup>2</sup> School of Architectural Engineering, Huanghuai University, Zhumadian 463000, China

<sup>3</sup> Faculty of Civil Engineering and Resource Management, AGH University of Science and Technology, Mickiewicza 30, 30-059 Kraków, Poland;

<sup>4</sup> Structural Engineering and Construction Management Department, Faculty of Engineering and Technology, Future University in Egypt, Cairo 11835, Egypt; ahmed.deifalla@fue.edu.eg

<sup>5</sup> School of Civil Engineering, Southeast University, Nanjing 210096, China

<sup>6</sup> Mineral and Energy Economy Research Institute of the Polish Academy of Sciences, J. Wybickiego 7a, 31-261 Kraków, Poland; arturdyczko@min-pan.krakow.pl

<sup>7</sup> Department of Civil Engineering, College of Engineering, King Khalid University, Abha 61421, Saudi Arabia; nbohlal@kku.edu.sa

<sup>8</sup> Laboratory of Systems and Applied Mechanics, Tunisia Polytechnic School, University of Carthage, La Marsa, Tunis 2078, Tunisia; miniar.atig@gmail.com

<sup>9</sup> Department of Civil Engineering, The Higher National Engineering School of Tunis, University of Tunis, Tunis, Tunisia

\* Correspondence: zdjs\_zqz@163.com (Q.Z.); pkamin@agh.edu.pl (P.K.); drsufian@seu.edu.cn (M.S.)

Table S1. Dataset used for prediction.

| Cement<br>(kg/m <sup>3</sup> ) | Water<br>(kg/m <sup>3</sup> ) | Sand<br>(kg/m <sup>3</sup> ) | Coarse<br>Aggregate<br>(kg/m <sup>3</sup> ) | Superplastic<br>izer (%) | Silica<br>Fume (%) | Fly<br>Ash<br>(%) | Vf of the Hooked<br>Steel Fiber (%) | Fiber<br>Length<br>(mm) | Fiber Dia<br>(mm) | Compressive<br>Strength MPa<br>(28 days) | Refere<br>nces |
|--------------------------------|-------------------------------|------------------------------|---------------------------------------------|--------------------------|--------------------|-------------------|-------------------------------------|-------------------------|-------------------|------------------------------------------|----------------|
| 440                            | 220                           | 1225                         | 366                                         | 3                        | 0                  | 0                 | 0                                   | 0                       | 0                 | 46.6                                     | 1              |
| 440                            | 220                           | 1215                         | 363                                         | 3.2                      | 0                  | 0                 | 0.5                                 | 31                      | 0.75              | 50.4                                     |                |
| 440                            | 220                           | 1205                         | 360                                         | 3.7                      | 0                  | 0                 | 1                                   | 31                      | 0.75              | 43.9                                     |                |
| 440                            | 220                           | 1193                         | 356                                         | 4                        | 0                  | 0                 | 1.5                                 | 31                      | 0.75              | 50.2                                     |                |
| 360                            | 180                           | 738                          | 1108                                        | 0.5                      | 0                  | 0                 | 0                                   | 30                      | 0.5               | 49.21                                    | 2              |
| 360                            | 180                           | 738                          | 1108                                        | 0.5                      | 0                  | 0                 | 0.5                                 | 30                      | 0.5               | 39.14                                    |                |
| 360                            | 180                           | 738                          | 1108                                        | 0.5                      | 0                  | 0                 | 1.5                                 | 30                      | 0.5               | 40.77                                    |                |
| 360                            | 180                           | 738                          | 1108                                        | 0.5                      | 0                  | 0                 | 2                                   | 30                      | 0.5               | 40.61                                    |                |
| 680                            | 180                           | 582                          | 872                                         | 1.5                      | 15                 | 0                 | 0                                   | 30                      | 0.5               | 90.14                                    |                |
| 680                            | 180                           | 582                          | 872                                         | 1.5                      | 15                 | 0                 | 0.5                                 | 30                      | 0.5               | 90.76                                    |                |
| 680                            | 180                           | 582                          | 872                                         | 1.5                      | 15                 | 0                 | 1.5                                 | 30                      | 0.5               | 95.01                                    | 3              |
| 680                            | 180                           | 582                          | 872                                         | 1.5                      | 15                 | 0                 | 2                                   | 30                      | 0.5               | 96.54                                    |                |
| 400                            | 242                           | 663                          | 1065                                        | 0                        | 40                 | 0                 | 0.25                                | 60                      | 0.9               | 26.1                                     |                |
| 400                            | 242                           | 663                          | 1065                                        | 0                        | 40                 | 0                 | 0.375                               | 60                      | 0.9               | 26.2                                     |                |
| 400                            | 242                           | 663                          | 1065                                        | 0                        | 40                 | 0                 | 0.5                                 | 60                      | 0.9               | 27                                       |                |
| 400                            | 198                           | 663                          | 1065                                        | 0                        | 40                 | 0                 | 0.25                                | 60                      | 0.9               | 34.6                                     |                |
| 400                            | 198                           | 663                          | 1065                                        | 0                        | 40                 | 0                 | 0.375                               | 60                      | 0.9               | 37.4                                     |                |
| 400                            | 198                           | 663                          | 1065                                        | 0                        | 40                 | 0                 | 0.5                                 | 60                      | 0.9               | 37.3                                     |                |
| 400                            | 165                           | 663                          | 1065                                        | 4.4                      | 40                 | 0                 | 0.25                                | 60                      | 0.9               | 46.7                                     | 4              |
| 400                            | 165                           | 663                          | 1065                                        | 4.4                      | 40                 | 0                 | 0.375                               | 60                      | 0.9               | 48.7                                     |                |
| 400                            | 165                           | 663                          | 1065                                        | 4.4                      | 40                 | 0                 | 0.5                                 | 60                      | 0.9               | 48.2                                     |                |
| 400                            | 152                           | 835                          | 1047                                        | 0                        | 0                  | 0                 | 0                                   | 0                       | 0                 | 32.4                                     |                |
| 400                            | 152                           | 835                          | 1047                                        | 0                        | 0                  | 0                 | 0.5                                 | 40                      | 0.615             | 33.4                                     |                |
| 400                            | 152                           | 835                          | 1047                                        | 0                        | 0                  | 0                 | 1                                   | 40                      | 0.615             | 37.3                                     |                |
| 400                            | 152                           | 835                          | 1047                                        | 0                        | 0                  | 0                 | 0.5                                 | 60                      | 0.75              | 34.1                                     |                |
| 400                            | 152                           | 835                          | 1047                                        | 0                        | 0                  | 0                 | 1                                   | 60                      | 0.75              | 38.5                                     |                |
| 400                            | 152                           | 835                          | 1047                                        | 0                        | 5                  | 0                 | 0                                   | 0                       | 0                 | 36.4                                     |                |
| 400                            | 152                           | 835                          | 1047                                        | 0                        | 5                  | 0                 | 0.5                                 | 40                      | 0.615             | 38.3                                     |                |
| 400                            | 152                           | 835                          | 1047                                        | 0                        | 5                  | 0                 | 1                                   | 40                      | 0.615             | 48.1                                     |                |
| 400                            | 152                           | 835                          | 1047                                        | 0                        | 5                  | 0                 | 0.5                                 | 60                      | 0.75              | 41.4                                     |                |
| 400                            | 152                           | 835                          | 1047                                        | 0                        | 5                  | 0                 | 1                                   | 60                      | 0.75              | 45.7                                     |                |
| 400                            | 152                           | 835                          | 1047                                        | 0                        | 10                 | 0                 | 0                                   | 0                       | 0                 | 56.2                                     |                |
| 400                            | 152                           | 835                          | 1047                                        | 0                        | 10                 | 0                 | 0.5                                 | 40                      | 0.615             | 60.4                                     |                |
| 400                            | 152                           | 835                          | 1047                                        | 0                        | 10                 | 0                 | 1                                   | 40                      | 0.615             | 66.9                                     |                |
| 400                            | 152                           | 835                          | 1047                                        | 0                        | 10                 | 0                 | 0.5                                 | 60                      | 0.75              | 59.7                                     | 5              |
| 400                            | 152                           | 835                          | 1047                                        | 0                        | 10                 | 0                 | 1                                   | 60                      | 0.75              | 63.7                                     |                |
| 400                            | 152                           | 835                          | 1047                                        | 0                        | 15                 | 0                 | 0                                   | 0                       | 0                 | 60.1                                     |                |
| 400                            | 152                           | 835                          | 1047                                        | 0                        | 15                 | 0                 | 0.5                                 | 40                      | 0.615             | 66.5                                     |                |
| 400                            | 152                           | 835                          | 1047                                        | 0                        | 15                 | 0                 | 1                                   | 40                      | 0.615             | 69.3                                     |                |
| 400                            | 152                           | 835                          | 1047                                        | 0                        | 15                 | 0                 | 0.5                                 | 60                      | 0.75              | 63.2                                     |                |
| 400                            | 152                           | 835                          | 1047                                        | 0                        | 15                 | 0                 | 1                                   | 60                      | 0.75              | 70.5                                     |                |
| 520                            | 172                           | 725                          | 853                                         | 0                        | 10                 | 0                 | 0                                   | 0                       | 0                 | 99.2                                     |                |
| 520                            | 172                           | 725                          | 853                                         | 0                        | 10                 | 0                 | 0                                   | 0                       | 0                 | 99.2                                     |                |
| 512                            | 169                           | 714                          | 841                                         | 0                        | 10                 | 0                 | 1.5                                 | 60                      | 0.75              | 98.7                                     |                |
| 510                            | 168                           | 710                          | 836                                         | 0                        | 10                 | 0                 | 2                                   | 30                      | 0.5               | 98.9                                     |                |
| 510                            | 168                           | 710                          | 836                                         | 0                        | 10                 | 0                 | 2                                   | 60                      | 0.75              | 95.3                                     |                |
| 550                            | 137.5                         | 682                          | 1050.5                                      | 0.25                     | 0                  | 0                 | 0                                   | 40                      | 0.62              | 85.5                                     | 6              |
| 550                            | 137.5                         | 682                          | 1050.5                                      | 0.25                     | 0                  | 0                 | 0.5                                 | 40                      | 0.62              | 87.8                                     |                |
| 550                            | 137.5                         | 682                          | 1050.5                                      | 0.25                     | 0                  | 0                 | 1                                   | 40                      | 0.62              | 90.3                                     |                |
| 550                            | 137.5                         | 682                          | 1050.5                                      | 0.25                     | 0                  | 0                 | 1.5                                 | 40                      | 0.62              | 92.7                                     |                |
| 550                            | 137.5                         | 682                          | 1050.5                                      | 0.25                     | 0                  | 0                 | 0.5                                 | 50                      | 0.62              | 87                                       |                |
| 550                            | 137.5                         | 682                          | 1050.5                                      | 0.25                     | 0                  | 0                 | 1                                   | 50                      | 0.62              | 90.7                                     |                |
| 550                            | 137.5                         | 682                          | 1050.5                                      | 0.25                     | 0                  | 0                 | 1.5                                 | 50                      | 0.62              | 93                                       |                |
| 550                            | 137.5                         | 682                          | 1050.5                                      | 0.25                     | 0                  | 0                 | 0.5                                 | 60                      | 0.75              | 86.6                                     |                |
| 550                            | 137.5                         | 682                          | 1050.5                                      | 0.25                     | 0                  | 0                 | 1                                   | 60                      | 0.75              | 91.6                                     |                |
| 550                            | 137.5                         | 682                          | 1050.5                                      | 0.25                     | 0                  | 0                 | 1.5                                 | 60                      | 0.75              | 93.8                                     |                |
| 450                            | 157.5                         | 715.5                        | 1053                                        | 0.15                     | 0                  | 0                 | 0                                   | 40                      | 0.62              | 61.7                                     |                |

|     |       |       |      |      |    |   |     |       |      |       |    |
|-----|-------|-------|------|------|----|---|-----|-------|------|-------|----|
| 450 | 157.5 | 715.5 | 1053 | 0.15 | 0  | 0 | 0.5 | 40    | 0.62 | 69.4  |    |
| 450 | 157.5 | 715.5 | 1053 | 0.15 | 0  | 0 | 1   | 40    | 0.62 | 72.3  |    |
| 450 | 157.5 | 715.5 | 1053 | 0.15 | 0  | 0 | 1.5 | 40    | 0.62 | 75.9  |    |
| 450 | 157.5 | 715.5 | 1053 | 0.15 | 0  | 0 | 0.5 | 50    | 0.62 | 73.8  |    |
| 450 | 157.5 | 715.5 | 1053 | 0.15 | 0  | 0 | 1   | 50    | 0.62 | 76.4  |    |
| 450 | 157.5 | 715.5 | 1053 | 0.15 | 0  | 0 | 1.5 | 50    | 0.62 | 77.3  |    |
| 450 | 157.5 | 715.5 | 1053 | 0.15 | 0  | 0 | 0.5 | 60    | 0.75 | 68    |    |
| 450 | 157.5 | 715.5 | 1053 | 0.15 | 0  | 0 | 1   | 60    | 0.75 | 70.6  |    |
| 450 | 157.5 | 715.5 | 1053 | 0.15 | 0  | 0 | 1.5 | 60    | 0.75 | 78.6  |    |
| 350 | 157.5 | 798   | 1078 | 0.12 | 0  | 0 | 0   | 40    | 0.62 | 52.4  |    |
| 350 | 157.5 | 798   | 1078 | 0.12 | 0  | 0 | 0.5 | 40    | 0.62 | 60.7  |    |
| 350 | 157.5 | 798   | 1078 | 0.12 | 0  | 0 | 1   | 40    | 0.62 | 64.1  |    |
| 350 | 157.5 | 798   | 1078 | 0.12 | 0  | 0 | 1.5 | 40    | 0.62 | 62.3  |    |
| 350 | 157.5 | 798   | 1078 | 0.12 | 0  | 0 | 0.5 | 50    | 0.62 | 55.8  |    |
| 350 | 157.5 | 798   | 1078 | 0.12 | 0  | 0 | 1   | 50    | 0.62 | 62.3  |    |
| 350 | 157.5 | 798   | 1078 | 0.12 | 0  | 0 | 1.5 | 50    | 0.62 | 64.2  |    |
| 350 | 157.5 | 798   | 1078 | 0.12 | 0  | 0 | 0.5 | 60    | 0.75 | 58.9  |    |
| 350 | 157.5 | 798   | 1078 | 0.12 | 0  | 0 | 1   | 60    | 0.75 | 59.7  |    |
| 350 | 157.5 | 798   | 1078 | 0.12 | 0  | 0 | 1.5 | 60    | 0.75 | 66.2  |    |
| 360 | 180   | 738   | 1108 | 0.5  | 0  | 0 | 0   | 30    | 0.5  | 49.21 |    |
| 360 | 180   | 738   | 1108 | 0.5  | 0  | 0 | 0.5 | 30    | 0.5  | 39.14 |    |
| 360 | 180   | 738   | 1108 | 0.5  | 0  | 0 | 1   | 30    | 0.5  | 40.77 |    |
| 360 | 180   | 738   | 1108 | 0.5  | 0  | 0 | 2   | 30    | 0.5  | 40.61 |    |
| 680 | 180   | 582   | 872  | 1.5  | 15 | 0 | 0   | 30    | 0.5  | 90.14 | 7  |
| 680 | 180   | 582   | 872  | 1.5  | 15 | 0 | 0.5 | 30    | 0.5  | 90.76 |    |
| 680 | 180   | 582   | 872  | 1.5  | 15 | 0 | 1   | 30    | 0.5  | 95.01 |    |
| 680 | 180   | 582   | 872  | 1.5  | 15 | 0 | 2   | 30    | 0.5  | 96.54 |    |
| 323 | 184   | 788   | 993  | 0    | 0  | 0 | 0   | 60    | 0.9  | 32.6  |    |
| 323 | 184   | 788   | 993  | 0    | 0  | 0 | 1   | 60    | 0.9  | 33.7  |    |
| 323 | 184   | 788   | 993  | 0    | 0  | 0 | 1.5 | 60    | 0.9  | 34.1  |    |
| 323 | 184   | 788   | 993  | 0    | 0  | 0 | 2   | 60    | 0.9  | 37.4  |    |
| 323 | 184   | 788   | 993  | 0    | 0  | 0 | 1   | 60    | 0.8  | 32.7  |    |
| 323 | 184   | 788   | 993  | 0    | 0  | 0 | 1.5 | 60    | 0.8  | 36    | 8  |
| 323 | 184   | 788   | 993  | 0    | 0  | 0 | 2   | 60    | 0.8  | 33.5  |    |
| 323 | 184   | 788   | 993  | 0    | 0  | 0 | 1   | 60    | 0.7  | 33.7  |    |
| 323 | 184   | 788   | 993  | 0    | 0  | 0 | 1.5 | 60    | 0.7  | 36.9  |    |
| 323 | 184   | 788   | 993  | 0    | 0  | 0 | 2   | 60    | 0.7  | 32.2  |    |
| 400 | 220   | 1020  | 560  | 0    | 0  | 0 | 1   | 30.5  | 0.49 | 29.1  |    |
| 400 | 220   | 1020  | 560  | 0    | 0  | 0 | 1.5 | 30.5  | 0.49 | 29.1  |    |
| 400 | 220   | 1020  | 560  | 0    | 0  | 0 | 2   | 30.5  | 0.49 | 29.1  |    |
| 400 | 220   | 1020  | 560  | 0    | 0  | 0 | 1   | 50.97 | 0.7  | 29.1  |    |
| 400 | 220   | 1020  | 560  | 0    | 0  | 0 | 1.5 | 50.97 | 0.7  | 29.1  | 9  |
| 400 | 220   | 1020  | 560  | 0    | 0  | 0 | 2   | 50.97 | 0.7  | 29.1  |    |
| 468 | 220   | 1008  | 449  | 0    | 0  | 0 | 1   | 30.5  | 0.49 | 51    |    |
| 468 | 220   | 1008  | 449  | 0    | 0  | 0 | 1.5 | 30.5  | 0.49 | 51    |    |
| 468 | 220   | 1008  | 449  | 0    | 0  | 0 | 2   | 30.5  | 0.49 | 51    |    |
| 430 | 133   | 739   | 1052 | 9    | 43 | 0 | 0   | 35    | 0.55 | 85    |    |
| 430 | 133   | 739   | 1052 | 9    | 43 | 0 | 0.5 | 35    | 0.55 | 91    |    |
| 430 | 133   | 739   | 1052 | 9    | 43 | 0 | 1   | 35    | 0.55 | 95    | 10 |
| 430 | 133   | 739   | 1052 | 9    | 43 | 0 | 1.5 | 35    | 0.55 | 98    |    |
| 430 | 133   | 739   | 1052 | 9    | 43 | 0 | 2   | 35    | 0.55 | 96    |    |
| 666 | 200   | 900   | 540  | 0    | 0  | 0 | 0.5 | 30    | 0.5  | 58.2  |    |
| 666 | 200   | 900   | 540  | 0    | 0  | 0 | 1   | 30    | 0.5  | 68.6  |    |
| 666 | 200   | 900   | 540  | 0    | 0  | 0 | 1.5 | 30    | 0.5  | 63.6  |    |
| 666 | 200   | 900   | 540  | 0    | 0  | 0 | 2   | 30    | 0.5  | 68.2  |    |
| 666 | 200   | 900   | 540  | 0    | 0  | 0 | 0.5 | 30    | 0.5  | 64.5  | 11 |
| 666 | 200   | 900   | 540  | 0    | 0  | 0 | 1   | 30    | 0.5  | 63.2  |    |
| 666 | 200   | 900   | 540  | 0    | 0  | 0 | 1.5 | 30    | 0.5  | 64.3  |    |
| 666 | 200   | 900   | 540  | 0    | 0  | 0 | 2   | 30    | 0.5  | 65.4  |    |
| 666 | 200   | 900   | 540  | 0    | 0  | 0 | 0.5 | 30    | 0.5  | 66.6  |    |
| 666 | 200   | 900   | 540  | 0    | 0  | 0 | 1   | 30    | 0.5  | 67.1  |    |

|     |     |      |      |      |       |    |      |    |      |       |    |
|-----|-----|------|------|------|-------|----|------|----|------|-------|----|
| 666 | 200 | 900  | 540  | 0    | 0     | 0  | 1.5  | 30 | 0.5  | 67.6  |    |
| 666 | 200 | 900  | 540  | 0    | 0     | 0  | 2    | 30 | 0.5  | 65.5  |    |
| 370 | 170 | 673  | 1150 | 0    | 0     | 0  | 0    | 60 | 0.75 | 45.3  |    |
| 370 | 170 | 673  | 1150 | 0    | 0     | 0  | 0.5  | 60 | 0.75 | 47.7  |    |
| 370 | 170 | 673  | 1150 | 0    | 0     | 0  | 0.76 | 60 | 0.75 | 52.1  |    |
| 370 | 170 | 673  | 1150 | 0    | 0     | 0  | 1    | 60 | 0.75 | 52    |    |
| 500 | 142 | 674  | 1100 | 2.5  | 0     | 0  | 0    | 60 | 0.75 | 72    | 12 |
| 500 | 142 | 674  | 1100 | 2.5  | 0     | 0  | 0.5  | 60 | 0.75 | 76.3  |    |
| 500 | 142 | 674  | 1100 | 2.5  | 0     | 0  | 0.76 | 60 | 0.75 | 76.2  |    |
| 500 | 142 | 674  | 1100 | 2.5  | 0     | 0  | 1    | 60 | 0.75 | 77.9  |    |
| 540 | 270 | 1350 | 0    | 0.4  | 0     | 0  | 0    | 13 | 0.2  | 27.62 |    |
| 540 | 270 | 1350 | 0    | 0.4  | 0     | 0  | 0.4  | 13 | 0.2  | 28.67 |    |
| 540 | 270 | 1350 | 0    | 0.4  | 0     | 0  | 0.6  | 13 | 0.2  | 28.47 | 13 |
| 540 | 270 | 1350 | 0    | 0.4  | 0     | 0  | 0.8  | 13 | 0.2  | 29.16 |    |
| 400 | 190 | 610  | 1130 | 0    | 0     | 0  | 0    | 30 | 0.54 | 29.8  |    |
| 400 | 190 | 600  | 1120 | 0    | 0     | 0  | 0.5  | 30 | 0.54 | 30.5  |    |
| 400 | 190 | 600  | 1110 | 0    | 0     | 0  | 1    | 30 | 0.54 | 31.2  |    |
| 400 | 190 | 590  | 1110 | 0    | 0     | 0  | 1.5  | 30 | 0.54 | 32.3  |    |
| 450 | 158 | 610  | 1140 | 2.85 | 0     | 0  | 0    | 30 | 0.54 | 56    |    |
| 450 | 158 | 610  | 1130 | 2.85 | 0     | 0  | 0.5  | 30 | 0.54 | 57    |    |
| 450 | 158 | 600  | 1120 | 2.85 | 0     | 0  | 1    | 30 | 0.54 | 57.8  | 14 |
| 450 | 158 | 600  | 1110 | 2.85 | 0     | 0  | 1.5  | 30 | 0.54 | 59.4  |    |
| 450 | 140 | 630  | 1170 | 3.22 | 11.12 | 0  | 0    | 30 | 0.54 | 72.4  |    |
| 450 | 140 | 625  | 1160 | 3.22 | 11.12 | 0  | 0.5  | 30 | 0.54 | 73.6  |    |
| 450 | 140 | 620  | 1150 | 3.22 | 11.12 | 0  | 1    | 30 | 0.54 | 74.8  |    |
| 450 | 140 | 615  | 1140 | 3.22 | 11.12 | 0  | 1.5  | 30 | 0.54 | 77    |    |
| 372 | 160 | 750  | 1140 | 2.2  | 7.5   | 0  | 0    | 30 | 0.5  | 56.1  |    |
| 372 | 160 | 750  | 1140 | 2.2  | 7.5   | 0  | 0.5  | 30 | 0.5  | 59.2  | 15 |
| 520 | 156 | 860  | 886  | 1    | 0     | 0  | 0    | 0  | 0    | 82.6  |    |
| 468 | 156 | 847  | 873  | 1.1  | 10    | 0  | 0.25 | 60 | 0.75 | 92.3  |    |
| 468 | 156 | 844  | 870  | 1.1  | 10    | 0  | 0.5  | 60 | 0.75 | 93.8  | 16 |
| 468 | 156 | 841  | 867  | 1.2  | 10    | 0  | 0.75 | 60 | 0.75 | 95    |    |
| 468 | 156 | 838  | 863  | 1.2  | 10    | 0  | 1    | 60 | 0.75 | 98.7  |    |
| 400 | 140 | 756  | 1135 | 1    | 0     | 0  | 0    | 35 | 0.55 | 77.1  |    |
| 400 | 140 | 754  | 1131 | 1    | 0     | 0  | 0.25 | 35 | 0.55 | 79.4  |    |
| 400 | 140 | 751  | 1127 | 1    | 0     | 0  | 0.5  | 35 | 0.55 | 78.2  |    |
| 400 | 140 | 746  | 1119 | 1    | 0     | 0  | 1    | 35 | 0.55 | 80.5  |    |
| 400 | 140 | 740  | 1111 | 1    | 0     | 0  | 1.5  | 35 | 0.55 | 81    |    |
| 340 | 140 | 750  | 1124 | 1    | 0     | 15 | 0    | 35 | 0.55 | 67.8  |    |
| 340 | 140 | 747  | 1120 | 1    | 0     | 15 | 0.25 | 35 | 0.55 | 69.4  |    |
| 340 | 140 | 744  | 1116 | 1    | 0     | 15 | 0.5  | 35 | 0.55 | 68.3  | 17 |
| 340 | 140 | 739  | 1108 | 1    | 0     | 15 | 1    | 35 | 0.55 | 71.7  |    |
| 340 | 140 | 734  | 1100 | 1    | 0     | 15 | 1.5  | 35 | 0.55 | 72.7  |    |
| 280 | 140 | 742  | 1114 | 1    | 0     | 30 | 0    | 35 | 0.55 | 63.6  |    |
| 280 | 140 | 740  | 1109 | 1    | 0     | 30 | 0.25 | 35 | 0.55 | 61.8  |    |
| 280 | 140 | 737  | 1106 | 1    | 0     | 30 | 0.5  | 35 | 0.55 | 64.4  |    |
| 280 | 140 | 732  | 1097 | 1    | 0     | 30 | 1    | 35 | 0.55 | 65    |    |
| 280 | 140 | 726  | 1090 | 1    | 0     | 30 | 1.5  | 35 | 0.55 | 60.7  |    |

## References

1. Soulioti, D.V.; Barkoula, N.M.; Paipetis, A.; Matikas, T.E. Effects of fibre geometry and volume fraction on the flexural behaviour of steel-fibre reinforced concrete. *Strain* **2011**, *47*, e535–e541.
2. Yoo, D.Y.; Yoon, Y.S.; Banthia, N. Flexural response of steel-fiber-reinforced concrete beams: Effects of strength, fiber content, and strain-rate. *Cem. Concr. Compos.* **2015**, *64*, 84–92.
3. Lee, J.H.; Cho, B.; Choi, E. Flexural capacity of fiber reinforced concrete with a consideration of concrete strength and fiber content. *Constr. Build. Mater.* **2017**, *138*, 222–231.
4. Köksal, F.; Altun, F.; Yiğit, I.; Sahin, Y. Combined effect of silica fume and steel fiber on the mechanical properties of high strength concretes. *Constr. Build. Mater.* **2008**, *22*, 1874–1880.
5. Yoon, E.S.; Park, S.B. An experimental study on the mechanical properties and long-term deformations of high-strength steel fiber reinforced concrete. *J. Korean Soc. Civ. Eng.* **2006**, *26*, 401–409.

6. Abbass, W.; Khan, M.I.; Mourad, S. Evaluation of mechanical properties of steel fiber reinforced concrete with different strengths of concrete. *Constr. Build. Mater.* **2018**, *168*, 556–569.
7. Yoo, D.Y.; Yoon, Y.S.; Banthia, N. Predicting the post-cracking behavior of normal-and high-strength steel-fiber-reinforced concrete beams. *Constr. Build. Mater.* **2015**, *93*, 477–485.
8. Lee, H.H.; Lee, H.J. Characteristic strength and deformation of SFRC considering steel fiber factor and volume fraction. *Journal of the Korea Concrete Institute* **2014**, *16*, 759–766.
9. Oh, Y.H. Evaluation of flexural strength for normal and high strength concrete with hooked steel fibers. *Journal of the Korea Concrete Institute* **2008**, *20*, 531–539.
10. Song, P.S.; Hwang, S. Mechanical properties of high-strength steel fiber reinforced concrete. *Constr. Build. Mater.* **2004**, *18*, 669–673.
11. Jang, S.J.; Yun, H.D. Combined effects of steel fiber and coarse aggregate size on the compressive and flexural toughness of high-strength concrete. *Compos. Struct.* **2018**, *185*, 203–211.
12. Aldossari, K.M.; Elsaigh, W.A.; Shannag, M.J. Effect of steel fibers on flexural behavior of normal and high strength concrete. *Int. J. Civ. Environ. Eng.* **2014**, *8*, 22–26.
13. Dinh, N.H.; Park, S.-H.; Choi, K.K. Effect of dispersed micro-fibers on tensile behavior of uncoated carbon textile-reinforced cementitious mortar after high-temperature exposure. *Cem. Concr. Compos.* **2021**, *118*, 103949.
14. Thomas, J.; Ramaswamy, A. Mechanical properties of steel fiber-reinforced concrete. *J. Mater. Civ. Eng.* **2007**, *19*, 385–392.
15. Sivakumar, A.; Santhanam, M. Mechanical properties of high strength concrete reinforced with metallic and non-metallic fibres. *Cem. Concr. Compos.* **2007**, *29*, 603–608.
16. Afroughsabet, V.; Ozbakkaloglu, T. Mechanical and durability properties of high-strength concrete containing steel and polypropylene fibers. *Constr. Build. Mater.* **2015**, *94*, 73–82.
17. Atis, C.D.; Karahan, O. Properties of steel fiber reinforced fly ash concrete. *Constr. Build. Mater.* **2009**, *23*, 392–399.
